1 **No evidence that mate choice in humans is dependent on the MHC**

2

3 Mircea Cretu-Stancu<sup>1</sup>, Wigard P. Kloosterman<sup>1</sup>, Sara L. Pulit<sup>1,2,3</sup>

4

5 1. Department of Genetics, Center for Molecular Medicine, University Medical Center  
6 Utrecht, Utrecht, The Netherlands

7 2. Li Ka Shing Center for Health Information and Discovery, Big Data Institute,  
8 Oxford University, Oxford, United Kingdom

9 3. Program in Medical and Population Genetics, Broad Institute, Boston, MA, USA

10

11 **Short title:**

12 No evidence that mate choice in humans is dependent on the MHC

13

14 **Corresponding authors:**

15 Dr. Sara L. Pulit  
16 Department of Genetics, University Medical Center Utrecht  
17 Heidelberglaan 100  
18 3584 CX Utrecht  
19 Utrecht, The Netherlands  
20 [s.l.pulit@umcutrecht.nl](mailto:s.l.pulit@umcutrecht.nl)

21

22 Dr. Wigard Kloosterman  
23 Department of Genetics, University Medical Center Utrecht  
24 Heidelberglaan 100  
25 3584 CX Utrecht  
26 Utrecht, The Netherlands  
27 [W.Kloosterman@umcutrecht.nl](mailto:W.Kloosterman@umcutrecht.nl)

28

29

## 30 **Abstract**

31 A long-standing hypothesis in biology proposes that various species select mates with a  
32 major histocompatibility complex (MHC) composition divergent from their own, so as to  
33 improve immune response in offspring. However, human and animal studies  
34 investigating this mate selection hypothesis have returned inconsistent results. Here, we  
35 analyze 239 mate-pairs of Dutch ancestry, all with whole-genome sequence data  
36 collected by the Genome of the Netherlands project, to investigate whether mate  
37 selection in humans is MHC dependent. We find no evidence for MHC-mediated mate  
38 selection in this sample (with an average MHC genetic similarity in mate pairs ( $Q_c$ ) =  
39 0.829; permutation-based  $p = 0.703$ ). Limiting the analysis to only common variation or  
40 considering the extended MHC region does not change our findings ( $Q_c = 0.671$ ,  $p =$   
41 0.513; and  $Q_c = 0.844$ ,  $p = 0.696$ , respectively). We demonstrate that the MHC in  
42 mate-pairs is no more genetically dissimilar (on average) than a pair of two randomly  
43 selected individuals, and conclude that there is no evidence to suggest that mate choice  
44 is influenced by genetic variation in the MHC.

45

46

47

48

49

50

51

52

53

54

## 55 **Author summary**

56 Studies within various animal species have shown that the genetic content of the major  
57 histocompatibility complex (MHC) can influence mate choice. Such mate selection would  
58 be advantageous, as mating between individuals with different alleles across MHC genes  
59 would produce offspring with a more diverse MHC and therefore possess improved  
60 immune response to various pathogens. Studies of the influence on the MHC in human  
61 mate selection have been far less conclusive. Two studies of MHC-dependent mate  
62 selection performed on SNP data collected as part of the HapMap Consortium returned  
63 conflicting results: the first study reported significantly different MHC variation between  
64 mate pairs, and the second report refuted this claim. Here, we analyze a dataset  
65 comprised of 239 whole-genome sequenced Dutch mate pairs, a sample set an order of  
66 magnitude larger than the HapMap data and containing denser characterization of  
67 genetic variation. We find no evidence that the MHC influences mate selection in our  
68 population, and we show that this finding is robust to potential confounding factors and  
69 the types and frequencies of genetic variants analysed.

70

71

## 72 **Introduction**

73

74 The extended major histocompatibility complex (MHC) spans an approximately 7-  
75 megabase region on chromosome 6 in humans. The region codes for a series of proteins  
76 critical to acquired immune function as well as olfactory genes [1]. Additionally, the MHC  
77 contains extensive genetic diversity [2,3], much more so than other regions of the  
78 genome; within the human population, the MHC contains thousands of different alleles  
79 and haplotypic combinations spanning the frequency spectrum. Genome-wide  
80 association studies (GWAS) have identified a plethora of genetic variants in the region  
81 associated to a host of diseases [4], both with and without previously-described roles for  
82 immune function [5–10].

83

84 Some biological studies have proposed that, beyond the direct role in immune function,  
85 the MHC may influence mate selection in vertebrate species. Increased MHC diversity is  
86 evolutionarily advantageous, as it improves immune response to a wider range of  
87 pathogens [11,12]. A number of studies in (non-human) animals indicate that some  
88 species of mice, birds, and fish, preferentially mate to maintain or increase MHC diversity  
89 [13–17]. For example, studies in sticklebacks [18] indicate that MHC-based mate  
90 selection helps to optimize copy number of particular MHC loci between mates. In mice,  
91 increased MHC dissimilarity between mates increases diversity of amino acid  
92 substitutions within binding-pockets of specific HLA molecules [19,20]. Many of these  
93 studies suggest that the observed MHC-dependent mate selection is mediated by the  
94 olfactory system, either through detectable residues that mates can smell [21], or  
95 because olfactory receptor genes are often found to cluster in close genomic proximity to  
96 the MHC [3].

97

98 Evidence for MHC-dependent mate selection in humans is far less conclusive. A study of  
99 411 couples from the Hutterite population, a population isolate in North America,

100 performed HLA typing across all couples and found that couples had more MHC diversity  
101 than expected under random mating [22]. Two additional studies, of 200 Amerindian  
102 couples [23] and 450 Japanese couples [24], respectively, concluded that the differences  
103 between the HLA-types of real couples were not significantly more different than the HLA  
104 types of random pairs of individuals. Finally, additional work has investigated whether  
105 the remnants of degraded HLA proteins end up in sweat, urine or saliva and can  
106 therefore be detected by potential mates through scent. To test the hypothesis that  
107 MHC-dependent mate selection in humans is mediated through olfactory processes,  
108 researchers have performed so-called 'sweaty t-shirt' experiments, and shown that  
109 females indicate an odor preference towards men that carry divergent HLA alleles  
110 relative to their own [25,26].

111  
112 Studies of genetic variation (beyond the classical HLA types) in humans have sought to  
113 provide clarity as to whether humans do indeed select mates, at least in part, such that  
114 diversity across the MHC increases in offspring. An initial analysis of array-based SNP  
115 genotyping data (variation with minor allele frequency (MAF) > 5%) assembled by the  
116 HapMap 2 Consortium [27] examined 30 European-ancestry mate pairs and 30 African-  
117 ancestry mate pairs and reported evidence of dissimilar MHC variation in couples of  
118 European descent ( $p = 0.015$ ) [17]. Conversely, no such effect was observed in the  
119 African-ancestry sample ( $p = 0.23$ ) [17]. A subsequent analysis in the same Hapmap  
120 Phase 2 European-ancestry data, but including an additional 24 European-ancestry  
121 mate-pairs genotyped as part of HapMap Phase 3 [28], failed to replicate the initial  
122 finding [29]. This second analysis demonstrated that the low sample size of the initial  
123 analysis (making the study sensitive to small changes in parameter choices) and failure  
124 to correct for multiple testing explained the initial report. Neither analysis of the 24 new  
125 mate-pairs nor joint analysis of all 54 available European-ancestry mate pairs revealed  
126 increased MHC dissimilarity in mates ( $p = 0.351$  and  $p = 0.143$ , respectively).

127

128 Here, we aim to test whether human mate pairs are indeed more dissimilar across the  
129 MHC, using a sample set that represents an order-of-magnitude increase over the initial  
130 reports. Specifically, we test the hypothesis that MHC variation is discordant between  
131 couples by analyzing a dataset of 239 unrelated Dutch mate pairs, whole-genome  
132 sequenced as part of the Genome of the Netherlands (GoNL) project [30]. The density  
133 and resolution of the whole-genome sequence data allow us to test for discordant MHC  
134 variation in mate pairs with respect to (a) common variation only (MAF > 1%); (b) the  
135 full frequency spectrum of genetic variants, including single nucleotide variants and short  
136 insertions and deletions; and (c) imputed amino acids and human leukocyte antigen  
137 (HLA) types within the MHC [31].

## 138 **Results**

139

### 140 **Reproducing the initial HapMap analysis**

141

142 We first sought to reproduce the finding of MHC-dependent mate selection in humans  
143 reported from an analysis of common variation in the Hapmap Phase 2 data [17], with  
144 the goal of not only replicating results but also aligning methodologies. The previous  
145 analysis used 30 trios of Northern- and Western-European ancestry living in Utah, USA  
146 (called the CEU sample) and 30 trios collected from the Yoruba population in Ibadan,  
147 Nigeria (called the YRI sample) [27,32,33] to evaluate MHC genetic dissimilarity in mate  
148 pairs. After reproducing the quality control procedures from the initial analysis as closely  
149 as possible (**Materials and Methods**), 27 CEU and 27 YRI mate-pairs remained for  
150 analysis (**Table 1**).

151

152 We used the same measure for genetic similarity between two individuals as defined in  
153 the initial report:  $Q_c$ , defined as 'the proportion of identical genotypes (at variant  
154 positions)' [17] between mate pairs (**Materials and Methods**). We compared the  
155 average similarity across real couples to the average similarity across randomly  
156 generated mate pairs (created by randomly drawing a male and a female from the  
157 sample) and obtained results that are close, but not identical to, the initial report  
158 (**Figure 1**). We calculated the difference between average genetic similarity across all  
159 true mate pairs and average genetic similarity across permuted mate pairs (i.e., average  
160  $Q_c$  across a null distribution; **Figure 1**) to explicitly quantify how genetic similarity in true mate  
161 pairs deviates from the null distribution. We call this metric  $\Delta Q_c$ . We found that the CEU mate pairs  
162 demonstrated nominally-significant ( $p < 0.05$ ) genetic dissimilarity across the MHC compared to  
163 permuted mate pairs ( $\Delta Q_c = -0.013$ , 2-sided  $p = 0.023$ ), while mate-pairs in the YRI samples

164 indicated no such relationship ( $\Delta Q_c = 0.003$ , 2-sided  $p = 0.442$ ). Genome-wide, CEU mate pairs  
165 showed no pattern of genetic similarity or dissimilarity ( $\Delta Q_c = -0.008$ , 2-sided  $p = 0.100$ )  
166 while YRI mate-pairs showed a pattern of genome-wide similarity (average  $Q_c = 0.011$ ,  
167 2-sided  $p < 10^{-6}$ ), consistent with the original report [17].

168

### 169 **Testing MHC-specific genetic dissimilarity in the Genome of the Netherlands**

170

171 Next, we sought to test if there was evidence for MHC-dependent mate selection in mate  
172 pairs collected as part of the Genome of the Netherlands (GoNL) project [30]. GoNL is  
173 comprised of Dutch-ancestry trios (confirmed by principal component analysis [30])  
174 drawn from 11 of the 12 provinces of the Netherlands and whole-genome sequenced at  
175  $\sim 14x$  average coverage on the Illumina HiSeq 2000 [30]. After data quality control and  
176 processing in the original project [30], the GoNL dataset contained 248 mate pairs.  
177 Because relatedness is a primary confounder for genetic similarity estimations, we  
178 calculated sample relatedness in Plink [34] and removed an additional 9 mate pairs with  
179  $\pi\text{-hat} > 0.03125$  (a threshold corresponding to 5th-degree relatedness; **Materials and**  
180 **Methods**). After this additional quality control, 239 mate pairs remained for analysis.  
181 We analyzed the GoNL data (<http://www.nlgenome.nl/>, see Code and Data Release in  
182 **Materials and Methods**) from Release 5 of the project, which includes single-nucleotide  
183 variants (SNVs) and short ( $< 20\text{bp}$ ) insertions and deletions (indels; **Table 1**).

184

185 To test for MHC-dependent mate selection in GoNL, we extracted the MHC (chromosome  
186 6, 28.7 - 33.3Mb on build hg19), calculated  $Q_c$  across all true GoNL mate pairs, and  
187 performed the same permutation scheme as in the HapMap analysis, randomizing the  
188 mate pairs, recalculating the average  $Q_c$  across these randomly-constructed pairs, and  
189 finally calculating  $\Delta Q_c$ . All  $p$ -values are 1-sided, testing the hypothesis of genetic  
190 dissimilarity, unless otherwise stated. Our results showed no evidence for MHC-  
191 dependent mate selection ( $\Delta Q_c = 0.0005$ , permutation  $p = 0.702$ , **Figure 2**). Restricting



192 our analyses to common- and low-frequency SNPs (MAF > 0.5%) or common SNPs only  
193 (MAF > 5%) did not change our results (**Table 1, Supplementary Figures 1 and 2**),  
194 nor did restricting the analysis specifically to the ~2M common SNPs genotyped in  
195 HapMap 2 or including the set of ~2M indels sequenced in GoNL into the analysis (**Table**  
196 **1 and Supplementary Figure 3**). To test the hypothesis that MHC mating is mediated  
197 through olfactory sensory pathways, as hypothesized previously [25,26], we performed  
198 the same analysis using an extended definition of the MHC (26.6Mb - 33.3Mb on hg19),  
199 which includes a dense cluster of 36 olfactory receptor genes upstream of the HLA Class  
200 I region [3]. We observed no statistically significant effect (**Table 1**, and  
201 **Supplementary Figures 4 and 5**).

202

203 Though the Netherlands is geographically small and densely populated, both common  
204 and rare variation in the GoNL data indicate geographic clustering [30,35–37]. We  
205 therefore investigated whether population stratification may explain the discordance  
206 between our results and the previous report of MHC-dependent mate selection in  
207 humans [17]. We performed genetic similarity analyses in the samples split into three  
208 geographic regions (“north,” “middle,” and “south” as determined by an identity-by-  
209 descent analysis [30]), as well as by province. Subsetting by region or province revealed  
210 no evidence for subpopulation-specific MHC-dependent mate selection (**Figure 2**).  
211 Additionally, accounting for sample ancestry using principal components (**Materials and**  
212 **Methods**) left our results unchanged ( $p = 0.78$ ).

213

214 Lastly, we used SNP2HLA [31] to impute 2- and 4-digit HLA alleles, amino acids and  
215 SNPs (**Materials and Methods**) into the GoNL samples as a means of evaluating  
216 genetic (dis)similarity across imputed HLA types. Given that the dosages output from  
217 SNP2HLA are phased, we used the Pearson’s correlation ( $r$ ) across the imputed allele  
218 dosages to calculate genetic similarity (instead of the  $Q_c$  metric). We found no evidence  
219 for MHC-dependent mate selection either across all imputed markers ( $p = 0.48$ , **Table**  
220 **1**) or by restricting the correlation calculation to only those variants, amino acids, and

221 HLA types within the classical HLA Class I and II gene bodies (and thus more likely to  
222 have functional effect;  $p = 0.74$ , **Table 1**).

223

224 Until this point, we had established a null distribution by permuting mate pairs and  
225 calculating genetic similarity. To generate an alternative null model for comparison, we  
226 randomly sampled 10,000 regions from the genome that either matched the MHC by size  
227 (i.e., total span of the region) or by number of variants contained within the region  
228 (regardless of the total linear span of the region capturing those markers). For each  
229 permutation, we randomly selected the region, computed  $Q_c$  (averaged across the 239  
230 true mate-pairs) and counted the number of times the mean  $Q_c$  was as or more  
231 dissimilar than that observed in the MHC. We observed no statistically significant  
232 difference, after accounting for multiple testing, when selecting regions based on  
233 genomic size or total number of markers in the region, after accounting for multiple  
234 testing (one-sided  $p = 0.08$  and  $0.02$ , respectively).

235

236

237

## 238 **Discussion**

239 Using the whole-genome sequencing data of 239 mate pairs, we have performed, to our  
240 knowledge, the most comprehensive investigation of MHC-dependent human mate  
241 selection to date. The Genome of the Netherlands resource provided both an increased  
242 sample size compared to previous efforts [17,29] and high density genetic variation  
243 data, allowing for analyses of rare variants, indels, and imputed HLA types. However,  
244 despite the size and genomic resolution of the data, our results indicate no evidence for  
245 MHC-dependent mate selection in humans. We performed further analyses to investigate  
246 the potential effects of geographical clustering of rare variants [30,35], but the results  
247 left our results and interpretation unchanged.

248

249 Notably, our results are inconsistent with an initial investigation of MHC-dependent mate  
250 selection using genome-wide genetic variation data [17]. Though these previous findings  
251 do not align with our own, the initial report of MHC-dependent mate selection in humans  
252 was likely too small ( $N = 60$ ) to draw conclusive results. Further, potential confounders,  
253 including cryptic relatedness and inbreeding amongst the studied samples, along with a  
254 lack of multiple testing correction, all likely contributed to this initial positive finding,  
255 subsequently contradicted in follow-up analyses of the same samples [29]. By  
256 interrogating a larger sample size, more stringently removing samples for relatedness  
257 and inbreeding, and performing analyses that account for potential population  
258 stratification, we believe our results provide more robust information as to whether mate  
259 selection in humans is influenced, at least in part, by individuals' genetic composition  
260 across the MHC. Additionally, our results are consistent with investigation of MHC-  
261 dependent mate selection using HLA types in similarly-sized sample sets [23,24].

262

263 While our results indicate that human mate selection is independent of genetic variation  
264 in the MHC, a number of studies examining genetic variation and complex traits have  
265 found a plethora of positive evidence for assortative mating in humans based on non-

266 MHC genetic factors. Previous studies have shown that human mate choice is associated  
267 to quantitative features (such as height) [38], to socioeconomic factors and risk for  
268 multifactorial disease [39–41]. A recent analysis in > 24,000 mate pairs, drawn from a  
269 number of cohorts including the UK Biobank [42] and 23andMe, focused on genomic loci  
270 associated to a number of multifactorial traits and found significant correlation between  
271 spouses at loci associated to height and body mass index [43]. By building a genetic  
272 predictor in one member of a spousal couple and applying it in the second member, the  
273 study also revealed varying degrees of spousal correlation at loci associated to waist-to-  
274 hip ratio, educational attainment, and blood pressure [43] in 7,780 couples from the UK  
275 Biobank. These correlations represent only a small slice of the numerous factors — both  
276 genetic and environmental — that contribute to mate selection in the human population.  
277 Importantly, however, these observations are correlative; the extent to which these  
278 associations are potentially causative remains to be explored.

279  
280 Though our analysis offers several improvements over previous analyses examining  
281 MHC-dependent mate selection, several limitations remain. First, as highlighted by the  
282 assortative mating studies discussed above, our sample size may not be large enough to  
283 detect a more modest signal for MHC-dependent mate selection, if such a phenomenon  
284 exists. Mate selection is likely influenced by a host of hundreds, if not thousands, of  
285 factors, all of which likely have modest effect. Therefore, analysis of 239 samples may  
286 not be sufficiently well powered to detect such an effect. Further, while we have used  
287 permutations of mate pairs to establish a null distribution to which we can compare true  
288 mate-pair genetic similarity, this distribution may not be sufficiently informative to  
289 detect MHC-dependent effects. Indeed, the authors of the initial analyses [17] reported  
290 similar difficulties establishing a null comparator: they sought to additionally use  
291 genome-wide genetic similarity as a basis of comparison for MHC similarity, but observed  
292 higher genome-wide similarity in YRI samples compared to the CEU [17]. Given the  
293 uniqueness of the MHC, from its gene density and extensive linkage disequilibrium to its

294 high genetic diversity, finding a genomic region with similar properties to use as a null  
295 comparator is essentially impossible; permutations of real mate pairs into random pairs,  
296 while not ideal, is likely the best null distribution for this experiment. Additionally, our  
297 analysis only examines one ancestral population. Analyses extended into other (non-  
298 European) samples may result in different findings.

299

300 Untested here is the hypothesis that preferential mating may favour specific  
301 combinations of HLA alleles that collectively result in an 'optimal' number of antigens  
302 that can be presented to T cell receptors. Previous studies indicate that this phenomenon  
303 may occur, specifically across Class I classical HLA genes [44], and may provide an  
304 alternative mechanism for MHC-mediated mate selection. Given the number of HLA allele  
305 combinations that would need to be constructed and analyzed to test such a hypothesis,  
306 power (after multiple test correction) would be vanishingly small. We therefore have not  
307 tested this specific hypothesis. However, additional information regarding gene function  
308 may make testing this hypothesis feasible in the future.

309

310 Despite these limitations, our analysis represents an improved investigation of MHC-  
311 dependent mate selection, through interrogated sample size as well as in the spectrum  
312 of genetic variation tested. Our data indicate no MHC-mediated preferential mating  
313 patterns in our European-ancestry sample. While MHC-mediated preferential mating has  
314 been reported in non-human animal models, such a mechanism in humans is either  
315 absent or may be one of many subtle contributors to mating patterns and behaviours.

316

## 317 **Materials and methods**

318

### 319 **Code and data release**

320 Individual-level data generated by the Genome of the Netherlands Project can be  
321 accessed through an application, available here: <http://www.nlgenome.nl/>. We provide  
322 code for this project at the following GitHub repository: [https://github.com/mcretu-](https://github.com/mcretu-umcu/matingPermutations)  
323 [umcu/matingPermutations](https://github.com/mcretu-umcu/matingPermutations).

324

### 325 **Ethics Statement**

326 All participants provided written informed consent as part of the Genome of the  
327 Netherlands project (<http://www.nlgenome.nl/>), and each biobank was approved by  
328 their respective institutional review board (IRB).

329

### 330 **Quality control of HapMap and Genome of the Netherlands data**

331 Related samples, by definition, are more likely to share more genetic variation compared  
332 to two unrelated individuals. To ensure that relatedness was not confounding our  
333 analyses, we performed basic quality control (QC) in the CEU, YRI and Genome of the  
334 Netherlands (GoNL) sample sets separately. The initial HapMap 2 analysis [17] filtered  
335 related couples by looking at the normalized Qc measure and defining outliers. We used  
336 the identity-by-descent (IBD) estimates, computed with Plink 1.9 [45] using the --  
337 genome command. Though this approach differs from the initial analysis, using IBD  
338 estimates are an established means for identifying related samples using genetic  
339 variation data.

340

341 To estimate relatedness, we first used Plink 1.9 to assemble a set of high-quality SNPs  
342 with minor allele frequency (MAF) > 10% and genotyping missingness < 0.1%. We  
343 pruned this set of SNPs at a linkage disequilibrium ( $r^2$ ) threshold of 0.2. Additionally, we

344 removed SNPs in the MHC, lactase (*LCT*) locus on chromosome 2, and in the inversions  
345 on chromosomes 8 and 17 (genomic coordinates in **Supplementary Table 1**). We  
346 calculated relatedness (--genome in Plink) across all individuals in the CEU and YRI mate  
347 pairs. We discarded three mate pairs (N = 6 samples) from the CEU sample and three  
348 mate pairs (N = 6 samples) from the YRI sample. We defined relatedness as  $\pi$ -hat >  
349 0.05 (i.e., shared 1/20th of the genome), close to the 1/22nd threshold used by Derti *et*  
350 *al.* [29]. Our filtering produced nearly identical results to the initial analyses  
351 (Supplementary Text S2 of [29]). Due to our slightly more stringent cutoff threshold, we  
352 additionally exclude the related pair of samples NA12892 and NA06994.

353

354 We filtered for relatedness in GoNL in an identical manner. We used a more stringent  
355 cryptic relatedness threshold of  $\pi$ -hat > 0.03125, corresponding to 5th-degree  
356 relatives. We discarded 9 couples from our analysis, leaving 239 QC-passing mate pairs.

357

### 358 **Calculating genetic similarity in mate pairs**

359 We define genetic similarity across a mate pair (called  $Q_c$ , per the initial report [17]) as  
360 the proportion of variants that are identical across a pair of individuals. Homozygous  
361 genotypes comprised of the same alleles (e.g., AA in sample 1 and AA in sample 2) are  
362 considered 100% similar; heterozygous genotypes (e.g., AB in both samples) are  
363 considered 50% similar, as they could have either the same or opposite phase; and all  
364 other combinations are considered 0% similar.

365

366 We note that in the initial report [17], genetic similarity was defined as:  $R = (Q_c -$   
367  $Q_m)/(1 - Q_m)$ , where  $Q_m$  is the average genetic similarity across all possible mate-pairs  
368 (real and permuted) that can be constructed in the sample. We note that the  $R$  measure  
369 is a linear transformation of  $Q_c$  measure, as  $Q_m$  is a constant for the analyzed sample.  
370 Further,  $Q_m$  is not an unbiased estimate of the average genetic similarity within random  
371 mate-pairs for two reasons: (1) because it includes both real mate-pairs and female-  
372 male pairs constructed by selecting two random individuals in the dataset; and (2)

373 because the sample pairs over which  $Q_m$  is averaged are not independent (i.e., the  
374 same individual is paired with all possible matches and thus considered multiple times  
375 when computing  $Q_m$ ). We therefore perform all our analyses using only the  $Q_c$  measure  
376 of genetic similarity.

377

## 378 **Replicating the original HapMap analysis**

379 The HapMap 2 genotyping data is publicly available [27,32,33] and includes a total of  
380 3,965,296 single nucleotide polymorphisms (SNPs). We extracted the MHC region (29.7  
381 - 33.3Mb on chromosome 6, build hg18, as defined in the original analysis) from each  
382 population separately: people of Northern and Western European ancestry (the CEU) and  
383 Yorubans from Ibadan, Nigeria (YRI). We performed these analyses in 27 CEU mate-  
384 pairs and 27 YRI mate-pairs, after filtering on sample relatedness (see *Quality Control of*  
385 *HapMap and Genome of the Netherlands Data*).

386

## 387 ***Evaluating significance of genetic similarity in true mate-pairs***

388 To evaluate whether genetic (dis)similarity in mate-pairs was significantly different than  
389 genetic similarity between two random individuals, we performed a permutation  
390 analysis. Specifically, we created 'null' (i.e., non-real) male-female pairs by randomly  
391 permuting the individuals in the true mate-pairs. Within any single permutation, we  
392 allowed for at most 1 real couple to enable faster sampling of random mate-pairs. We  
393 performed a total 1,000,000 permutations to generate a null distribution (**Figures 1** and  
394 **2**). Finally, we count the number of permutations that yield an average  $Q_c$  that is the  
395 same or lower than the  $Q_c$  measured in the true mate-pairs. The total number of such  
396 permutations divided by 1,000,000 is the exact p-value of the test. This permutation  
397 scheme was used to evaluate the significance of  $Q_c$  as measured in common variants, all  
398 variants, and imputed HLA variants.

399



## 400 **Analysis of mate-pairs in the Genome of the Netherlands (GoNL)**

### 401 **data**

402 We repeated the same analysis in the Genome of the Netherlands data (GoNL), in the  
403 239 mate-pairs that passed quality control. In the GoNL data, we estimated  $Q_c$  in three  
404 sets of variants (**Table 1**): common biallelic variants only, all available single nucleotide  
405 variants regardless of frequency, and in all available variants (including insertions and  
406 deletions). For a fourth set of variants - imputed HLA variation - we measured genetic  
407 similarity using Pearson's correlation ( $r$ ), as the imputed variation data was phased and  
408 left no ambiguity as to how heterozygous genotypes correlated (e.g., the difference  
409 between observing the AB genotype in Sample 1 and the AB genotype in Sample 2; or  
410 observing the AB genotype in Sample 1 and the BA genotype in Sample 2). To evaluate  
411 the significance of  $Q_c$  in true mate-pairs, we used the identical permutation scheme as  
412 used in the HapMap analysis and described above.

413

### 414 ***HLA imputation***

415 We use SNP2HLA (<http://software.broadinstitute.org/mpg/snp2hla/>) [31] and a  
416 reference panel built from HLA typing performed in the Type 1 Diabetes Genetics  
417 Consortium (T1DGC) (containing 8,961 markers) [31] to impute SNPs, HLA types and  
418 amino acid substitutions across 8 classical HLA loci. For imputation, 3,256 SNPs in GoNL  
419 overlap the T1DGC reference panel data. After the MHC imputation was complete, we  
420 first performed quality control, removing samples where the total number of imputed  
421 alleles is  $> 2.5$  (introduced by imprecision in the imputation algorithm) and removing all  
422 variants for which the imputation quality ('info') metric is  $< 0.8$ .

423

### 424 ***Correcting for population structure in the GoNL samples***

425 As the Dutch samples are drawn from 11 of the 12 provinces in the Netherlands, subtle  
426 population structure can be observed in both common and rare variants [30]. Analysis in  
427 the original GoNL effort indicated that the first two principal components reveal a subtle

428 north-to-south gradient, and analysis of rarer (so-called “ $f_2$ ”) variants (two alleles  
429 appearing in the entire dataset) indicate strong clustering within geographical regions  
430 (north, center, and south, as inferred by IBD analyses) [30]. We thus sought to explore  
431 whether population structure, either across the country or by province, may be  
432 confounding a potential signal for MHC-dependent mate selection. To do this, we used  
433 principal component analysis as well as province-specific analyses.

434

435 Genetic PCs are calculated on an individual basis and are an alternative means of  
436 unravelling genetic ancestral clustering between individuals. We first needed to collapse  
437 individual-level PC loadings into a single value that represented a single mate-pair. We  
438 call this collapsed PC the ‘mate-pair PC’ ( $PC_{mp}$ ). Assume that the PC1 loading for a  
439 female in a given mate-pair is denoted  $PC1_f$ , and PC1 loading for the male in that mate-  
440 pair is denoted  $PC1_m$ , then  $PC1_{mp}$  (continuing up to PC ‘n’) is defined as follows:

441

$$442 \quad PC1_{mp} = (PC1_f - PC1_m)^2$$

443 ...

$$444 \quad PCn_{mp} = (PCn_f - PCn_m)^2$$

445

446 In this way, we used the PCs of the GoNL individuals to obtain, for each (real or  
447 permuted) pair of individuals, a  $PC_{mp}$  value that is equal to 0 if the loadings of the two  
448 individuals in a pair are identical for a given PC, or becomes increasingly large as the two  
449 samples’ loadings on a particular PC diverge.

450

451 We then used the mate-pairs of one random permutation of the 239 mate-pairs in GoNL  
452 to train a linear regression model that approximates the genetic similarity between two  
453 individuals ( $Q_c$ ), using the mate-pair PCs as defined above:

454

$$455 \quad Q_{Chat} \sim PC1_{mp} + PC2_{mp} + \dots + PC10_{mp}$$

456

457  $Q_{\text{chat}}$  estimates the genetic similarity explained by the first 10 PCs for all mate-pairs (real  
458 or permuted) as well as residuals ( $Q_{\text{res}}$ ) from this regression. If there is preferential  
459 mating among the true mate-pairs in GoNL, the residuals of this regression model should  
460 be systematically different compared to residuals from randomly-assigned male-female  
461 pairs. We performed the same initial permutation analysis, on the whole set of 239 true  
462 mate-pairs, but using  $Q_{\text{res}}$  (instead of  $Q_{\text{c}}$ ) as a measure of genetic similarity adjusted  
463 for population stratification. We then compared where the average  $Q_{\text{res}}$  across the 239  
464 true mate-pairs falls within the distribution of average  $Q_{\text{res}}$  across 239 randomly  
465 generated male-female pairs.

466

### 467 **Genetic dissimilarity in non-MHC regions**

468 In addition to permuting mate-pairs to establish a null distribution for  $Q_{\text{c}}$ , we also wanted to establish  
469 a null distribution of  $Q_{\text{c}}$  by randomly sampling regions from the genome that were matched to the  
470 MHC based on different characteristics. Because the MHC is an extremely unique genomic region —  
471 in gene density, in span of linkage disequilibrium, and in genetic variability — it is nearly impossible to  
472 identify regions of the genome that behave identically to the MHC. To identify genomically similar  
473 regions to the MHC from which we could construct a null distribution for  $Q_{\text{c}}$ , we identified regions that  
474 either (1) were the same genomic span as the MHC (~3.6 Mb), or (2) contained approximately  
475 the same number of markers (~40k), regardless of the linear span of that window. For  
476 each criterion (SNP density or span), we randomly sampled 10,000 regions from the  
477 genome and computed average  $Q_{\text{c}}$  across all 239 true mate-pairs, for each region; we  
478 compared these distributions to  $Q_{\text{c}}$  calculated in true mate-pairs across the MHC.

479

480

481

## 482 **Acknowledgements**

483

484 The Genome of the Netherlands Consortium (<http://www.nlgenome.nl/>) generated and  
485 analyzed the whole-genome sequencing data analyzed here. A complete list of the  
486 Genome of the Netherlands members and affiliations can be found here:  
487 [http://www.nlgenome.nl/?page\\_id=28](http://www.nlgenome.nl/?page_id=28).

488

489 We thank Paul IW de Bakker for supporting MCS with funding from VIDI grant 91712354  
490 from the Dutch Organization for Scientific Research (Nederlandse Organisatie voor  
491 Wetenschappelijk Onderzoek (NWO) - ZonMw) and for his critical review of the  
492 manuscript.

493

## 494 **References**

495

496 1. De Bakker PIW, McVean G, Sabeti PC, Miretti MM, Green T, Marchini J, et al. A high-  
497 resolution HLA and SNP haplotype map for disease association studies in the  
498 extended human MHC. *Nat Genet.* Nature Publishing Group; 2006;38: 1166–1172.

499 2. Horton R, Gibson R, Coggill P, Miretti M, Allcock RJ, Almeida J, et al. Variation  
500 analysis and gene annotation of eight MHC haplotypes: the MHC Haplotype Project.  
501 *Immunogenetics.* 2008;60: 1–18.

502 3. Horton R, Wilming L, Rand V, Lovering RC, Bruford EA, Khodiyar VK, et al. Gene map  
503 of the extended human MHC. *Nat Rev Genet.* 2004;5: 889–899.

504 4. Welter D, MacArthur J, Morales J, Burdett T, Hall P, Junkins H, et al. The NHGRI  
505 GWAS Catalog, a curated resource of SNP-trait associations. *Nucleic Acids Res.*  
506 2014;42: D1001–6.

507 5. Pereyra F, Jia X, McLaren PJ, Telenti A, de Bakker PIW, Walker BD, et al. The major  
508 genetic determinants of HIV-1 control affect HLA class I peptide presentation.  
509 *Science.* 2010;330: 1551–1557.

510 6. Hinks A, Bowes J, Cobb J, Ainsworth HC, Marion MC, Comeau ME, et al. Fine-  
511 mapping the MHC locus in juvenile idiopathic arthritis (JIA) reveals genetic  
512 heterogeneity corresponding to distinct adult inflammatory arthritic diseases. *Ann*  
513 *Rheum Dis.* 2017;76: 765–772.

514 7. Xie G, Roshandel D, Sherva R, Monach PA, Lu EY, Kung T, et al. Association of  
515 Granulomatosis With Polyangiitis (Wegener's) With HLA-DPB1\*04 and SEMA6A Gene  
516 Variants: Evidence From Genome-Wide Analysis. *Arthritis & Rheumatism.* 2013;65:  
517 2457–2468.

518 8. Cortes A, Pulit SL, Leo PJ, Pointon JJ, Robinson PC, Weisman MH, et al. Major

- 519 histocompatibility complex associations of ankylosing spondylitis are complex and  
520 involve further epistasis with ERAP1. *Nat Commun.* 2015;6: 7146.
- 521 9. Zhang F-R, Liu H, Irwanto A, Fu X-A, Li Y, Yu G-Q, et al. HLA-B\*13:01 and the  
522 dapsons hypersensitivity syndrome. *N Engl J Med.* 2013;369: 1620–1628.
- 523 10. Purcell SM, Wray NR, Stone JL, Visscher PM, O'Donovan MC, Sullivan PF, et al.  
524 Common polygenic variation contributes to risk of schizophrenia and bipolar  
525 disorder. *Nature.* 2009;460: 748–752.
- 526 11. Potts WK, Wakeland EK. Evolution of diversity at the major histocompatibility  
527 complex. *Trends Ecol Evol.* 1990;5: 181–187.
- 528 12. Penn, Penn, Potts. The Evolution of Mating Preferences and Major Histocompatibility  
529 Complex Genes. *Am Nat.* 1999;153: 145.
- 530 13. Potts WK, Manning CJ, Wakeland EK. Mating patterns in seminatural populations of  
531 mice influenced by MHC genotype. *Nature.* 1991;352: 619–621.
- 532 14. Olsson M, Madsen T, Nordby J, Wapstra E, Ujvari B, Wittsell H. Major  
533 histocompatibility complex and mate choice in sand lizards. *Proc Biol Sci.* 2003;270  
534 Suppl 2: S254–6.
- 535 15. Landry C, Garant D, Duchesne P, Bernatchez L. “Good genes as heterozygosity”: the  
536 major histocompatibility complex and mate choice in Atlantic salmon (*Salmo salar*).  
537 *Proc Biol Sci.* 2001;268: 1279–1285.
- 538 16. Olsén KH, Grahn M, Lohm J, Langefors Å. MHC and kin discrimination in juvenile  
539 Arctic charr, *Salvelinus alpinus* (L.). *Anim Behav.* 1998;56: 319–327.
- 540 17. Chaix R, Cao C, Donnelly P. Is mate choice in humans MHC-dependent? Array,  
541 editor. *PLoS Genet.* Public Library of Science; 2008;4: 1–5.
- 542 18. Aeschlimann PB, Häberli MA, Reusch TBH, Boehm T, Milinski M. Female sticklebacks  
543 *Gasterosteus aculeatus* use self-reference to optimize MHC allele number during

- 544 mate selection. *Behav Ecol Sociobiol.* Springer-Verlag; 2003;54: 119–126.
- 545 19. Yamazaki K, Boyse EA, Miké V, Thaler HT, Mathieson BJ, Abbott J, et al. Control of  
546 mating preferences in mice by genes in the major histocompatibility complex. *J Exp*  
547 *Med.* 1976;144: 1324–1335.
- 548 20. Penn D, Potts WK. Untrained mice discriminate MHC-determined odors. *Physiol*  
549 *Behav.* 1998;64: 235–243.
- 550 21. Brown RE, Roser B, Singh PB. Class I and class II regions of the major  
551 histocompatibility complex both contribute to individual odors in congenic inbred  
552 strains of rats. *Behav Genet.* 1989;19: 659–674.
- 553 22. Ober C, Weitkamp LR, Cox N, Dytch H, Kostyu D, Elias S. HLA and mate choice in  
554 humans. *Am J Hum Genet.* 1997;61: 497–504.
- 555 23. Hedrick PW, Black FL. HLA and mate selection: no evidence in South Amerindians.  
556 *Am J Hum Genet.* 1997;61: 505–511.
- 557 24. Ihara Y, Aoki K, Tokunaga K, Takahashi K, Juji T. HLA and Human Mate Choice. Tests  
558 on Japanese Couples. *Anthropol Sci.* 2000;108: 199–214.
- 559 25. Wedekind C, Seebeck T, Bettens F, Paepke AJ. MHC-dependent mate preferences in  
560 humans. *Proc Biol Sci.* 1995;260: 245–249.
- 561 26. Wedekind C, Furi S. Body odour preferences in men and women: do they aim for  
562 specific MHC combinations or simply heterozygosity? *Proc Biol Sci.* 1997;264: 1471–  
563 1479.
- 564 27. Frazer KA, Ballinger DG, Cox DR, Hinds DA, Stuve LL, Gibbs RA, et al. A second  
565 generation human haplotype map of over 3.1 million SNPs. *Nature.* 2007;449: 851–  
566 861.
- 567 28. Altshuler DM, Gibbs RA, Peltonen L, Dermitzakis E, Schaffner SF, Yu F, et al.  
568 Integrating common and rare genetic variation in diverse human populations.

- 569 Nature. 2010;467: 52–58.
- 570 29. Derti A, Cenik C, Kraft P, Roth FP. Absence of Evidence for MHC–Dependent Mate  
571 Selection within HapMap Populations. PLoS Genet. Public Library of Science; 2010;6:  
572 e1000925.
- 573 30. Francioli LC, Menelaou A, Pulit SL, van Dijk F, Palamara PF, de Bakker PIW, et al.  
574 Whole-genome sequence variation, population structure and demographic history of  
575 the Dutch population. Nat Genet. 2014;46: 818–825.
- 576 31. Jia X, Han B, Onengut-Gumuscu S, Chen W-M, Concannon PJ, Rich SS, et al.  
577 Imputing amino acid polymorphisms in human leukocyte antigens. PLoS One.  
578 2013;8: e64683.
- 579 32. The International HapMap Consortium., Gibbs RA, Belmont JW, Hardenbol P, Willis  
580 TD, Yu F, et al. The International HapMap Project. Nature. 2003;426: 789–796.
- 581 33. International HapMap Consortium. A haplotype map of the human genome. Nature.  
582 2005;437: 1299–1320.
- 583 34. Purcell S, Neale B, Todd-Brown K, Thomas L, Ferreira M a. R, Bender D, et al. PLINK:  
584 a tool set for whole-genome association and population-based linkage analyses. Am  
585 J Hum Genet. 2007;81: 559–575.
- 586 35. Mathieson I, McVean G. Differential confounding of rare and common variants in  
587 spatially structured populations. Nat Genet. Nature Publishing Group; 2012;44: 243–  
588 246.
- 589 36. Mathieson I, McVean G. Demography and the Age of Rare Variants. PLoS Genet.  
590 2014;10: e1004528.
- 591 37. Auton A, Abecasis GR, Altshuler DM, Durbin RM, Bentley DR, Chakravarti A, et al. A  
592 global reference for human genetic variation. Nature. 2015;526: 68–74.
- 593 38. Silventoinen K, Kaprio J, Lahelma E, Viken RJ, Rose RJ. Assortative mating by body



- 594 height and BMI: Finnish twins and their spouses. *Am J Hum Biol.* 2003;15: 620–627.
- 595 39. Vandenburg SG. Assortative mating, or who marries whom? *Behav Genet.* 1972;2:  
596 127–157.
- 597 40. Hippisley-Cox J, Coupland C, Pringle M, Crown N, Hammersley V. Married couples'  
598 risk of same disease: cross sectional study. *BMJ.* 2002;325: 636.
- 599 41. Willemsen G, Vink JM, Boomsma DI. Assortative mating may explain spouses' risk of  
600 same disease. *BMJ.* 2003;326: 396.
- 601 42. Sudlow C, Gallacher J, Allen N, Beral V, Burton P, Danesh J, et al. UK biobank: an  
602 open access resource for identifying the causes of a wide range of complex diseases  
603 of middle and old age. *PLoS Med.* 2015;12: e1001779.
- 604 43. Robinson MR, Kleinman A, Graff M, Vinkhuyzen AAE, Couper D, Miller MB, et al.  
605 Genetic evidence of assortative mating in humans. *Nat hum behav.* 2017;1: 0016.
- 606 44. Buhler S, Nunes JM, Sanchez-Mazas A. HLA class I molecular variation and peptide-  
607 binding properties suggest a model of joint divergent asymmetric selection.  
608 *Immunogenetics.* 2016;68: 401–416.
- 609 45. Chang CC, Chow CC, Tellier LC, Vattikuti S, Purcell SM, Lee JJ. Second-generation  
610 PLINK: rising to the challenge of larger and richer datasets. *Gigascience.* 2015;4: 1–  
611 16.
- 612
- 613
- 614
- 615

617 **Figures and Tables**

618

619

620

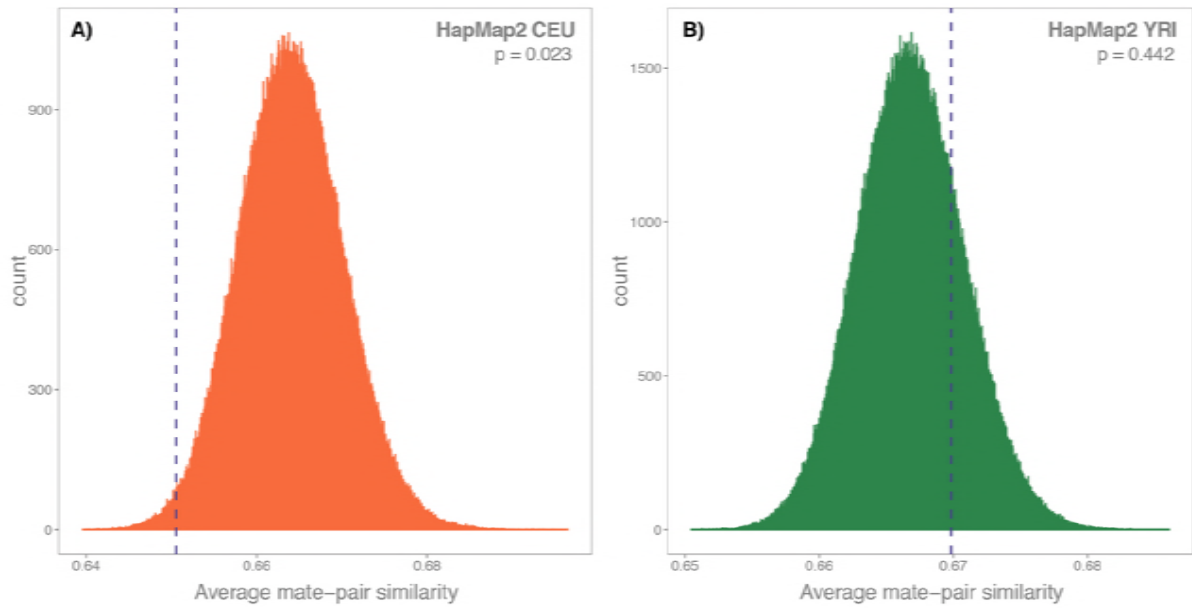

621

622 **Figure 1**

623

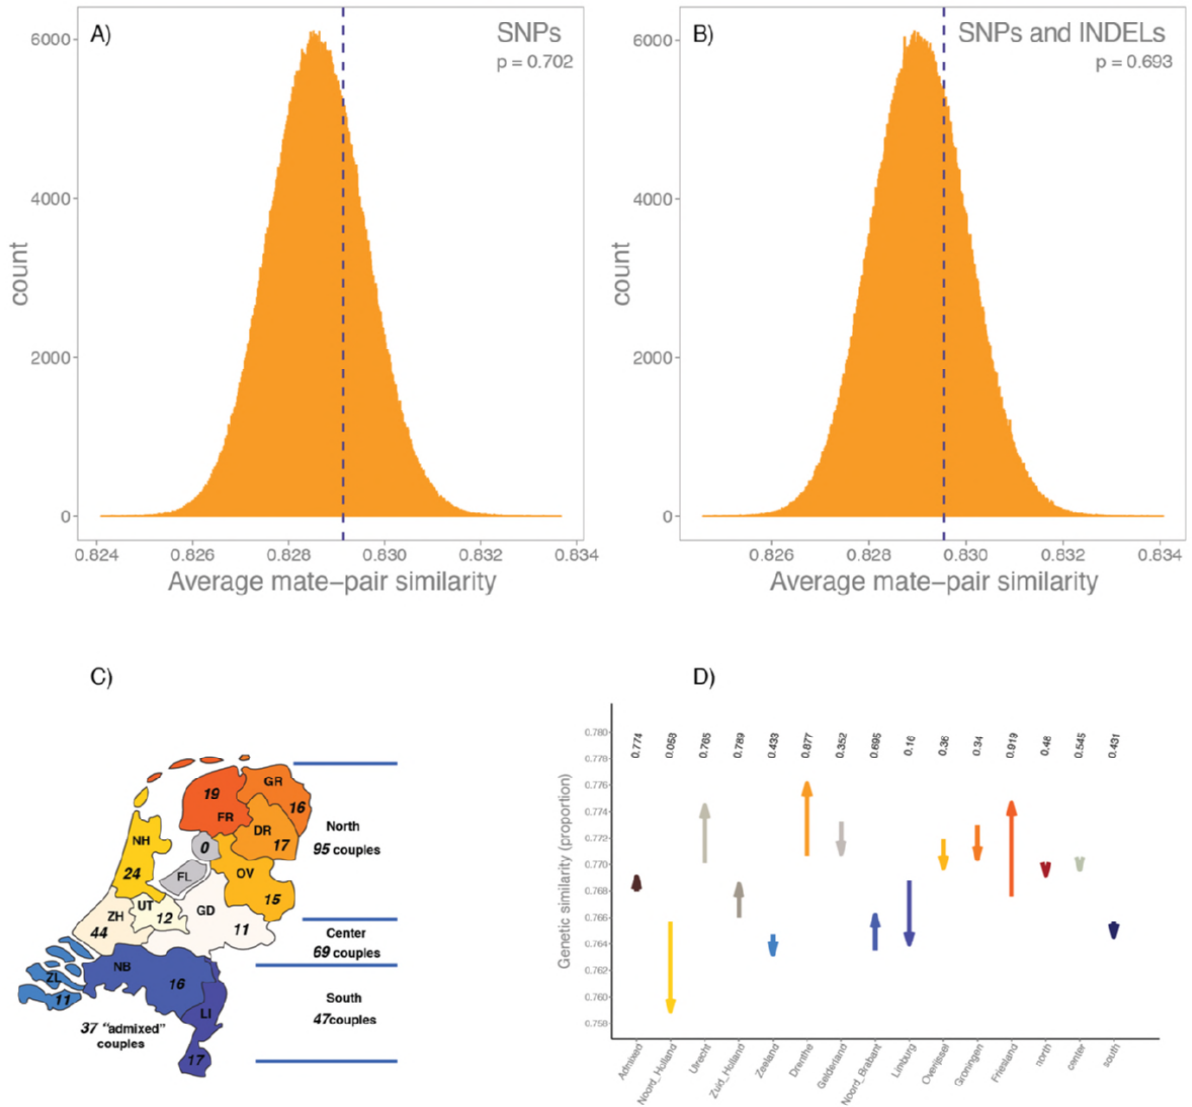

624

625 **Figure 2**

626

627 **Figure 1 | Genetic similarity across mate pairs in the HapMap 2 data.** The distributions

628 represent the null distribution of average MHC similarity ( $Q_c$ ), across randomly permuted mate pairs from each of

629 the HapMap 2 populations tested (CEU: European samples of Northern and Western descent, orange; YRI:

630 Yorubans in Ibadan Nigeria, green). The average MHC similarity in true mate pairs is marked by the blue dotted

631 line. All p-values are based on 1,000,000 permutations and delta  $Q_c$  ( $\Delta Q_c$ ) is the difference between the average

632 real-couple similarity and the average of the distribution of random mate-pair permutations. **(A)** Permutation

633 of the 27 QC-passing HapMap 2 CEU couples.  $\Delta Q_c = -0.013$ , 2-sided  $p = 0.023$ . **(B)** Permutations of

634 the 27 QC-passing HapMap 2 YRI couples.  $\Delta Q_c = 0.003$ , 2-sided  $p = 0.442$ .

635

636

637 **Figure 2 | Genetic similarity across the MHC for 239 Dutch-ancestry mate-pairs.** Panels

638 **(A)** and **(B)** show the null distribution (histograms) of average mate-pair genetic similarity of

639 permuted (i.e., non-real) male-female pairs. We performed a total of 1,000,000 permutations to

640 generate the distribution. The average genetic similarity across 239 real mate pairs is represented

641 with a blue vertical dotted line. **(A)** Genetic similarity measured across all biallelic variants within

642 the MHC ( $p = 0.702$ ). **(B)** Genetic similarity measured across all biallelic variants and

643 insertions/deletions (indels) in the MHC ( $p = 0.693$ ). **(C)** The GoNL samples were drawn from 11

644 of the 12 Dutch provinces. Here, we indicate the number of true mate-pairs available for analysis

645 where both members of the mate-pair come from the same geographic region. These three

646 geographic regions (north, center, and south) are derived from previously-performed population

647 genetic analyses of the GoNL data. **(D)** Genetic similarity of mate-pairs, split by province. The

648 arrows start at the average genetic similarity of permuted (i.e., null) mate pairs and stops at the

649 average genetic similarity across true mate-pairs. Corresponding, one sided p-values for the

650 genetic dissimilarity within couples are marked above.

651

652

653

654 **Supporting information Legends:**

655 **SupplementaryMaterials.docx** : File containing Supplementary Figures 1 through 5, referenced  
656 in the main text.

657 **CoverletterPlosGenCretuStancu.docx** : Cover letter to the PLoS Genetics editors

658

659 **Tables:**

| Sample | Number of mate-pairs | Data type              | Variant type(s)            | Variant filters              | Variant count | $\Delta Q_c$ | p-value |
|--------|----------------------|------------------------|----------------------------|------------------------------|---------------|--------------|---------|
| CEU    | 27                   | Genotyping<br>(HapMap) | SNVs                       | MAF > 5%                     | 6,247         | -0.0130      | 0.023   |
| YRI    | 27                   |                        |                            | 5,773                        | 0.0030        | 0.442        |         |
| GoNL   | 239                  | Sequencing             | SNVs                       | None                         | 60,339        | 0.0005       | 0.702   |
|        |                      |                        |                            | HapMap2 sites                | 8,573         | 0.0004       | 0.513   |
|        |                      |                        |                            | MAF > 0.5%                   | 44,088        | 0.0007       | 0.703   |
|        |                      |                        |                            | MAF > 5%                     | 31,145        | 0.0001       | 0.709   |
|        |                      |                        |                            | Extended MHC                 | 36,413        | 0.0004       | 0.696   |
|        |                      |                        |                            | SNVs + indels                | 63,357        | 0.0004       | 0.693   |
|        |                      | HLA imputation         | SNVs                       | $r^2 > 0.8$                  | 8,290         | -            | 0.480   |
|        |                      |                        | HLA alleles<br>Amino acids | Genic markers<br>$r^2 > 0.8$ | 2,452         | -            | 0.740   |

660

661 **Table 1 | Samples and variants used in analysis.** To investigate whether mate selection is  
662 MHC-dependent, we analyzed three sample groups: Utah residents with Northern and Western  
663 European ancestry (CEU); Yorubans from Ibadan, Nigeria (YRI); and mate-pairs in the Genome of  
664 the Netherlands (GoNL) project. The number of mate pairs indicates the number of pairs available

665 after sample quality control. We performed our analysis in common polymorphisms (minor allele  
666 frequency (MAF) > 0.05) or common- and low-frequency single nucleotide variants (SNVs, with  
667 MAF > 0.5%), as well as including indel variation, where available. For imputed data, we kept only  
668 well-imputed data, based on the Beagle imputation quality metric ( $r^2 > 0.8$ ). We additionally  
669 restricted the set of variants to only variants within the classical HLA genes including amino acid  
670 substitutions, single nucleotide polymorphisms (SNP), insertions and/or deletions (indels) and  
671 classical HLA-types ('genic markers').

672
